# Supplementary material
Source: PubMed Central journal article supplement (PMC2851824)
Supplement: 0912675107_pnas.200912675SI.pdf [file 0912675107_pnas.200912675SI.pdf]

# Supporting Information

Chae et al. 10.1073/pnas.0912675107

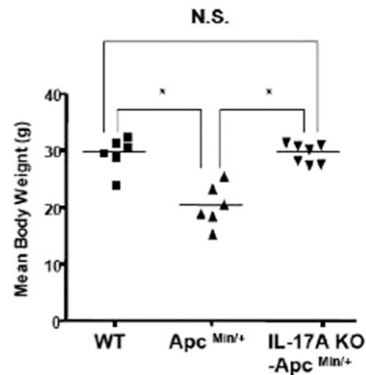

Fig. S1. Mean body weights of WT (C57BL/6) ( $n = 6$ ),  $Apc^{Min/+}$  ( $n = 6$ ), and IL-17A KO-  $Apc^{Min/+}$  ( $n = 7$ ) mice were measured at week 20.  $*\alpha < 0.05$ ; N.S., nonsignificant.

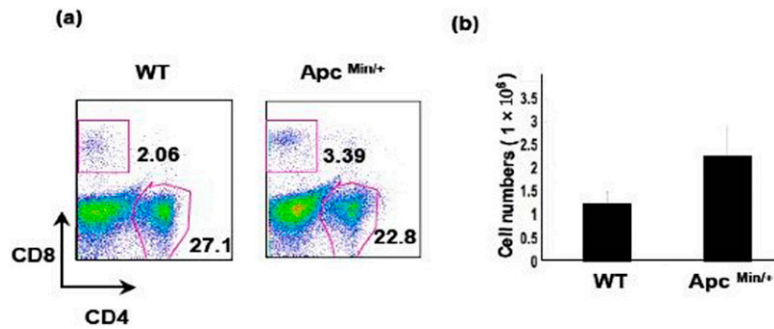

Fig. S2. CD4 and CD8 T cells in lamina propria are increased in  $Apc^{Min/+}$  mice. (A) WT ( $n = 3$ ) and  $Apc^{Min/+}$  ( $n = 3$ ) mice were killed at week 13 and lamina propria was prepared. Cells were stained with murine anti-CD4 and anti-CD8 antibodies and analyzed by flow cytometry. (B) Total number of lamina propria cells in WT and  $Apc^{Min/+}$  mice.

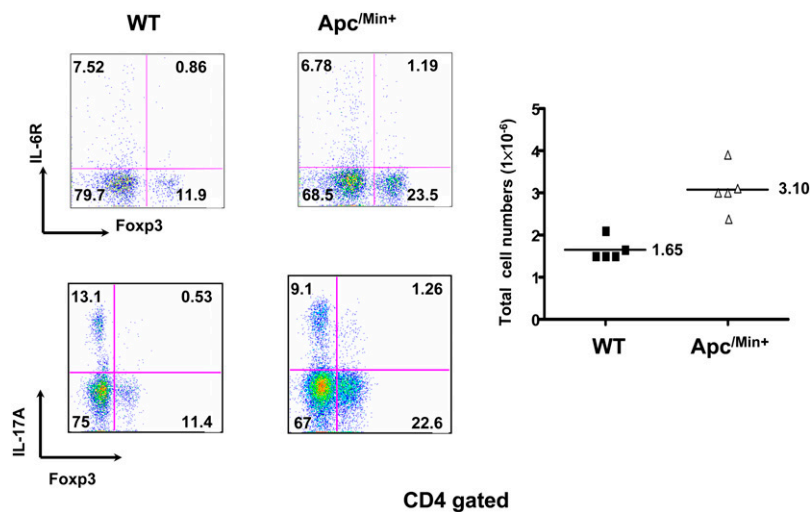

Fig. S3. IL-6R is not up-regulated to induce Th17 cells. Lamina propria lymphocytes from 16-week-old  $Apc^{Min/+}$  mice and their littermate controls were prepared as described. Cells were counted and stained with anti-CD4, anti-IL-6R $\alpha$  (CD126), anti-Fc $\gamma$ 3, and anti-IL-17A. For measuring IL-6R $\alpha$  and IL-17A, PMA/ionomycin was used to stimulate cells for 6 h. Brefeldin A and monensin A were used at 1:1,000 dilution and added to the culture for the last 4 h of culture. A representative of five mice per group is shown after CD4 gating. The total number of lamina propria lymphocytes are shown.

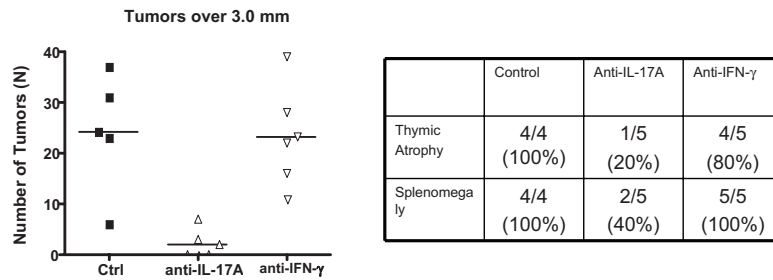

**Fig. S4.** IL-17A mAb depletion significantly reduces intestinal tumorigenesis.  $Apc^{Min/+}$  mice were treated weekly for 5 weeks with 150  $\mu$ g of anti-IL-17A antibody per animal ( $n = 5$ ). Anti-IFN- $\gamma$  antibody was used weekly for 10 weeks with 400  $\mu$ g per animal ( $n = 5$ ). All mice were killed at week 16 and tumor numbers, splenomegaly, and thymic atrophy were quantitated.

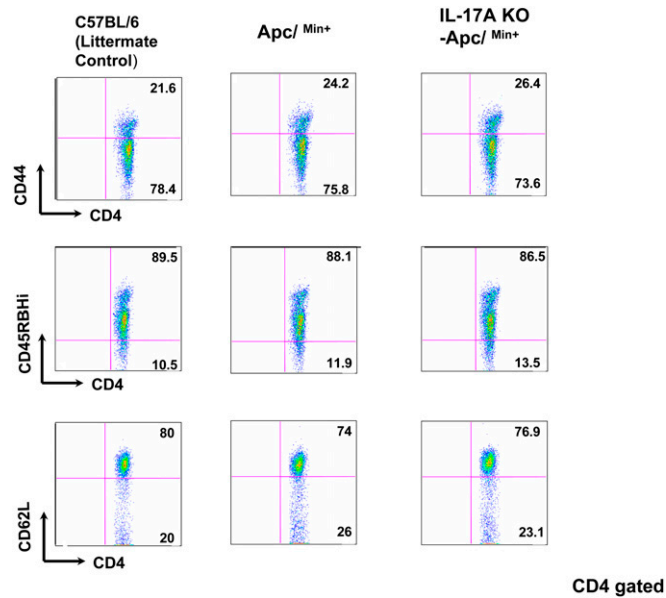

**Fig. S5.** CD4 T cell surface markers does not undergo significant changes. Splenocytes from 11- to 12-week-old  $Apc^{Min/+}$  mice and their littermate control as well as IL-17A KO-  $Apc^{Min/+}$  mice were prepared and stained with anti-CD44, anti-CD45RB<sup>hi</sup>, and anti-CD62L antibodies. A representative of three mice per group is shown.

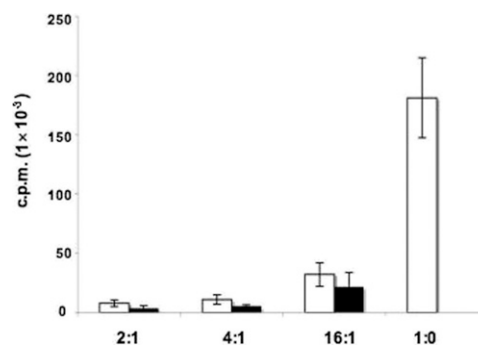

**Fig. S6.** Regulatory T cells from  $Apc^{Min/+}$  mice are functional in vitro. CD4<sup>+</sup>Foxp3<sup>-</sup> (i.e., effector CD4 T cells) were isolated from Foxp3-IRES-RFP mice. Regulatory T cells were isolated from Foxp3-IRES-RFP- $Apc^{Min/+}$  mice or their littermate control (WT) mice by cell sorting. WT effector CD4 T cells were increased in ratio as indicated and cocultured with WT regulatory T cells (white bar) or  $Apc^{Min/+}$  regulatory T cells (black bar) in the presence of anti-CD3 and T cell-depleted irradiated splenocytes for 72 h. As a positive control, CD4<sup>+</sup>Foxp3<sup>-</sup> T cells were stimulated without regulatory T cells.

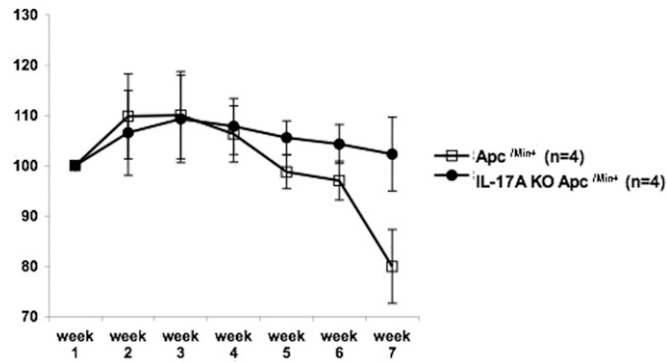

**Fig. 57.** CD4<sup>+</sup>CD45RB<sup>low</sup>CD25<sup>+</sup> cells cannot maintain suppressive function in vivo. CD4<sup>+</sup>CD45RB<sup>low</sup>CD25<sup>+</sup> cells ( $0.8 \times 10^5$ ) were FACS-sorted from 11-week-old Apc<sup>Min/+</sup> mice and IL-17A KO- Apc<sup>Min/+</sup> mice. CD4<sup>+</sup>CD45RB<sup>hi</sup>CD25<sup>-</sup> T cells ( $4.0 \times 10^5$ ) from C57BL/6 mice were sorted and cotransferred to Rag2 KO mice. Mean body weight was monitored weekly.

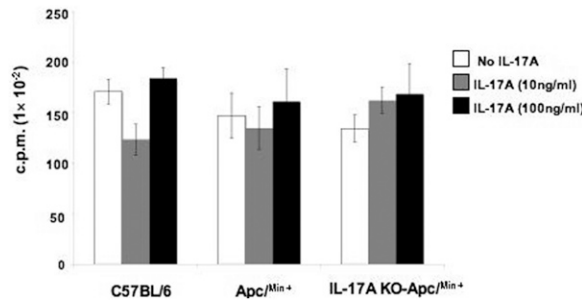

**Fig. 58.** IL-17A does not affect on Apc<sup>Min/+</sup> CD4 T cells and IL-17A KO-Apc<sup>Min/+</sup> CD4 T cells. CD4 T cells were prepared by sorting and stimulated with 1  $\mu$ g/mL of anti-CD3 (145-2C11) and  $1 \times 10^5$  T cell-depleted and irradiated (2500 rads) splenocytes for 72 h. Ten or 100 ng/mL of IL-17A was added during the culture. Thymidine [<sup>3</sup>H] was added for the last 10 h of culture.

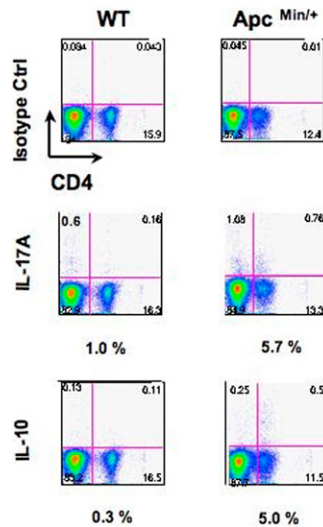

**Fig. 59.** Apc<sup>Min/+</sup> CD4 T cells are expressing more IL-10 and IL-17A in Peyer patches. Fourteen- to 15-week-old APC/Min mice and their littermate control mice were killed and Peyer patch cells were stimulated with PMA (100 ng/mL)/ionomycin (1  $\mu$ M) for 6 h. Brefeldin A (1  $\mu$ g/mL) was added to the culture for the last 4 h. Intracellular staining was performed with anti-IL-10, anti-IL-17A, and isotype control antibody. The percentage in the bottom of each flow cytometry panel shows the percentage of IL-10- or IL-17A-positive cells among gated CD4<sup>+</sup> T cells. Representative of two independent experiments.
